# Supplementary material for: Broad-spectrum nanoparticles against bacteriophage infections
Source: Royal Society of Chemistry journal article supplement (doi:10.1039/d1nr04936d), 2021-01-01
Supplement: d1nr04936d1.pdf [file d1nr04936d1.pdf]

Supplementary Information

## Broad-spectrum nanoparticles against bacteriophage infections

*Lukasz Richter,<sup>a</sup> Karolina Paszkowska,<sup>b</sup> Urszula Cendrowska,<sup>a</sup> Francesca Olgiati,<sup>a</sup> Paulo Jacob Silva,<sup>a</sup> Matteo Gasbarri,<sup>a</sup> Zekiye Pelin Guven,<sup>a</sup> Jan Paczesny,<sup>b</sup> Francesco Stellacci<sup>\*,a,c</sup>*

<sup>a</sup> Institute of Materials, Ecole Polytechnique Fédérale de Lausanne (EPFL), 1015 Lausanne, Switzerland

<sup>b</sup> Institute of Physical Chemistry of the Polish Academy of Sciences, Kasprzaka 44/52, 01-224 Warsaw, Poland

<sup>c</sup> Institute of Bioengineering, École Polytechnique Fédérale de Lausanne, 1015 Lausanne, Switzerland

### Calculation of the molecular mass of MUS:OT (85:15) nanoparticles

The calculations of molecular mass of nanoparticles were performed as previously described in the literature.<sup>1</sup> Nanoparticles are composed of gold core and shell of ligands arranged onto gold surface.

$$M_{tot} = M_{core} + M_{shell}$$

$$V_{core} = \frac{4}{3}\pi(r_{core})^3$$

$$V_{shell} = \frac{4}{3}\pi(r_{core} + r_{shell})^3 - \frac{4}{3}\pi(r_{core})^3$$

$$M_{tot} = \rho_{Au}V_{core} + \rho_{ligands}V_{shell}$$

$$M_w = M_{tot}N_A$$

where  $M_{tot}$  is total mass of single nanoparticle,  $M_{core}$  is mass of the gold core,  $M_{shell}$  is mass of the ligand shell.  $V_{core}$  is volume of the gold core,  $V_{shell}$  is volume of the ligand shell and  $N_A$  is Avogadro number. Radius of gold core  $r_{core}$  is 1.35 nm and the length of the MUS ligand  $r_{shell}$  equals approximately 1.7 nm. Density of gold  $\rho_{Au}$  is 19.3 g mL<sup>-1</sup> and density of ligands  $\rho_{ligands}$  is roughly 1.2 g mL<sup>-1</sup>. Therefore, molecular mass of nanoparticles is 198.3 kDa.

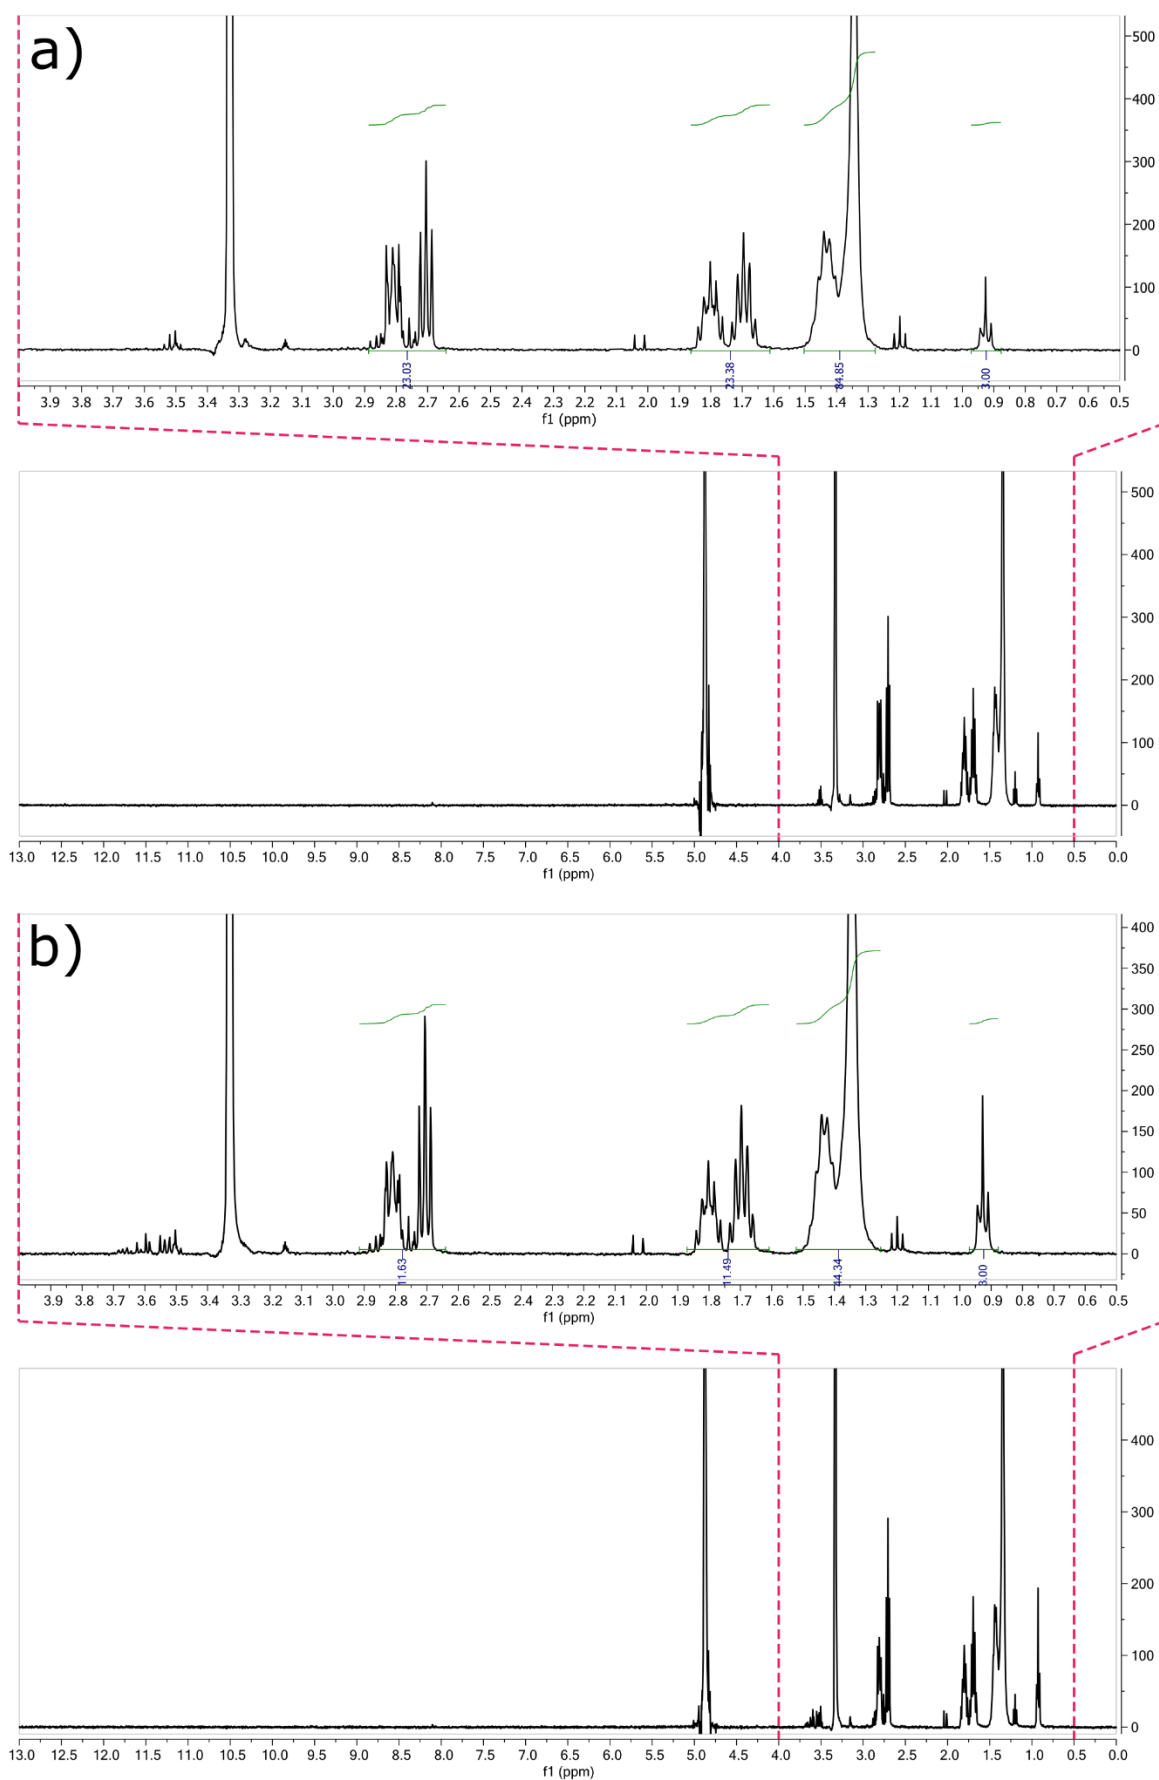

Fig. S1.  $^1\text{H}$  NMR of (a) MUS:OT (85:15) and (b) MUS:OT (70:30) nanoparticles etched with iodine. Integrated peaks were used to calculate the ratio between MUS and OT ligands as reported by Guven et al.<sup>2</sup> Calculated values were rounded to 5%.

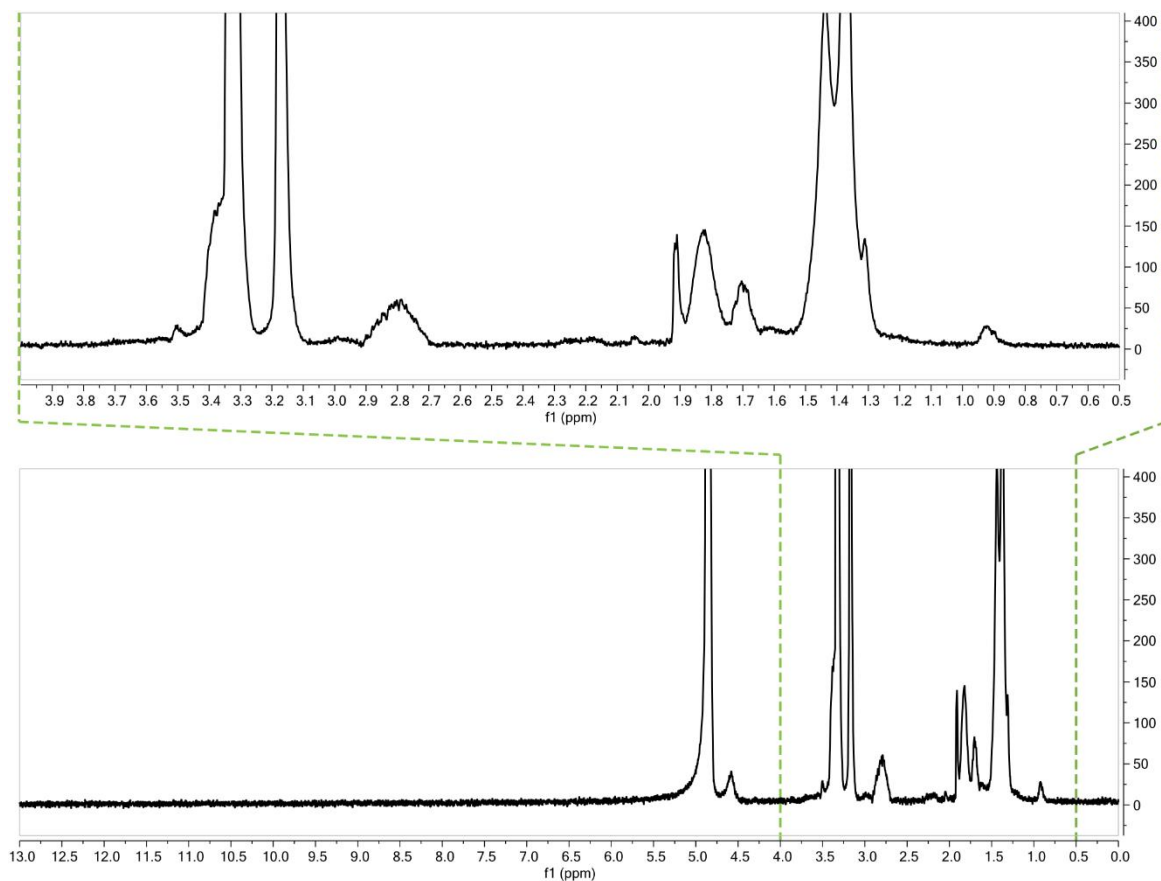

Fig. S2. <sup>1</sup>H NMR of TMA nanoparticles etched with iodine.

Table S1. Comparison of properties of all studied nanoparticles.

| Name           | Activity  | Ligands                                           | Core size [nm] | Zeta potential [mV] |
|----------------|-----------|---------------------------------------------------|----------------|---------------------|
| MUS:OT (70:30) | Virucidal | <chem>CCCCCCCCCCCCCCCCCS(=O)(=O)[O-].[Na+]</chem> | $3.0 \pm 1.2$  | $-19.8 \pm 0.8$     |
|                |           | <chem>CCCCCCCCCCCCCCCCCS</chem>                   |                |                     |
| MUS:OT (85:15) | Virucidal | <chem>CCCCCCCCCCCCCCCCCS(=O)(=O)[O-].[Na+]</chem> | $2.7 \pm 1.0$  | $-26.6 \pm 3.7$     |
|                |           | <chem>CCCCCCCCCCCCCCCCCS</chem>                   |                |                     |
| MUS            | No effect | <chem>CCCCCCCCCCCCCCCCCS(=O)(=O)[O-].[Na+]</chem> | $3.0 \pm 1.0$  | -                   |

|                 |           |                                                                                    |               |                 |
|-----------------|-----------|------------------------------------------------------------------------------------|---------------|-----------------|
| TMA             | Virucidal | 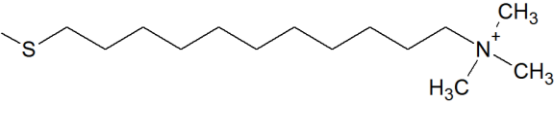 | $4.3 \pm 1.9$ | $25.6 \pm 2.3$  |
| EG <sub>4</sub> | No effect |  | $3.7 \pm 1.1$ | $-13.8 \pm 2.3$ |

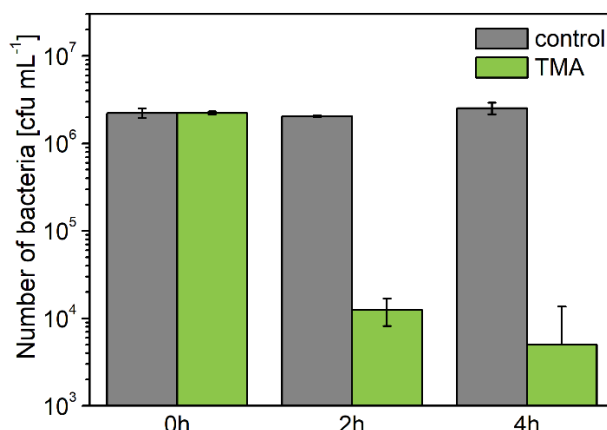

Fig. S3. Analysis of the cytotoxic effect of nanoparticles coated with TMA ligand. Bacteria *E. coli* BL21 were incubated at 37 °C in PBS buffer with 0.5 mg mL<sup>-1</sup> of TMA nanoparticles. 2 log decrease of alive bacteria was visible after 2 h of incubation. The number of bacteria was measured with the colony count method on LB-agar plates.

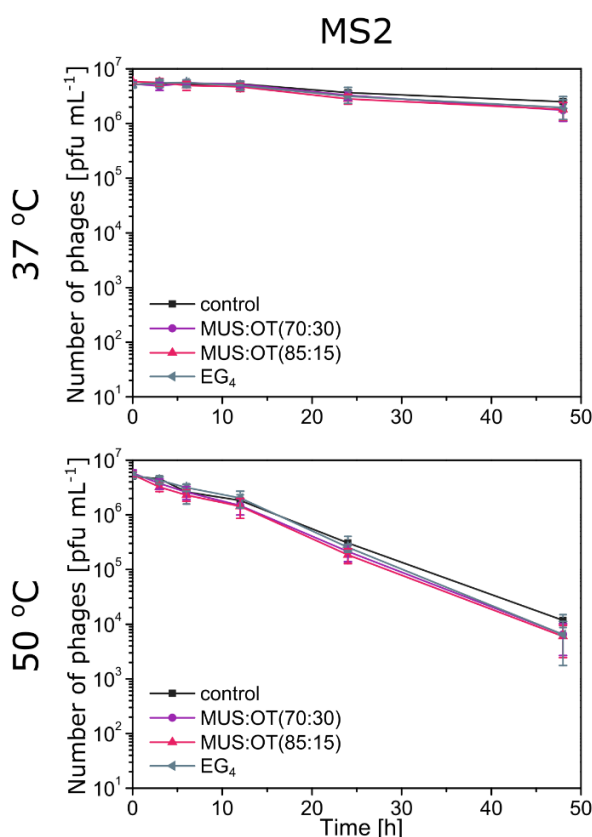

Fig. S4. Analysis of the effect of studied nanoparticles on spherical bacteriophages MS2. Phages were incubated over many days with 0.5 mg mL<sup>-1</sup> of negatively charged (MUS:OT) and neutral (EG<sub>4</sub>) nanoparticles at 37 °C or 50 °C. The number of phages was measured at various time points. Tested nanoparticles showed no deactivating effect against phages MS2.

## Synthesis of nanoparticles coated with MUS ligand

First, gold salt ( $\text{HAuCl}_4 \cdot 3\text{H}_2\text{O}$ ; 0.45 mmol) and MUS ligand (0.45 mmol) were dissolved in ethanol (100 mL) and mixed for 15 min. Then, sodium borohydride ( $\text{NaBH}_4$ ; 25 mmol) dissolved in ethanol (100 mL) was added dropwise to the mixture upon mixing over 2 h. The reaction was continued for an additional 24 h. Precipitated nanoparticles were then washed by centrifugation using ethanol and finally purified with Milli-Q water on Amicon<sup>®</sup> Ultra-15 centrifugal filter devices (10k or 30k NMWL). The particles were then suspended in a small amount of water (~2 mL) and freeze-dried.

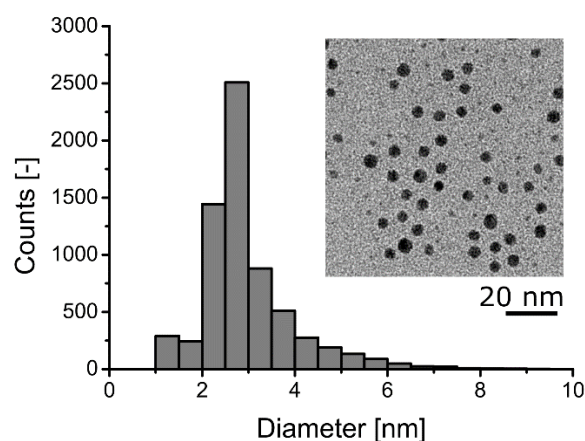

Fig. S5. The size distribution of prepared nanoparticles coated with MUS ligands. Inset shows a representative TEM image.

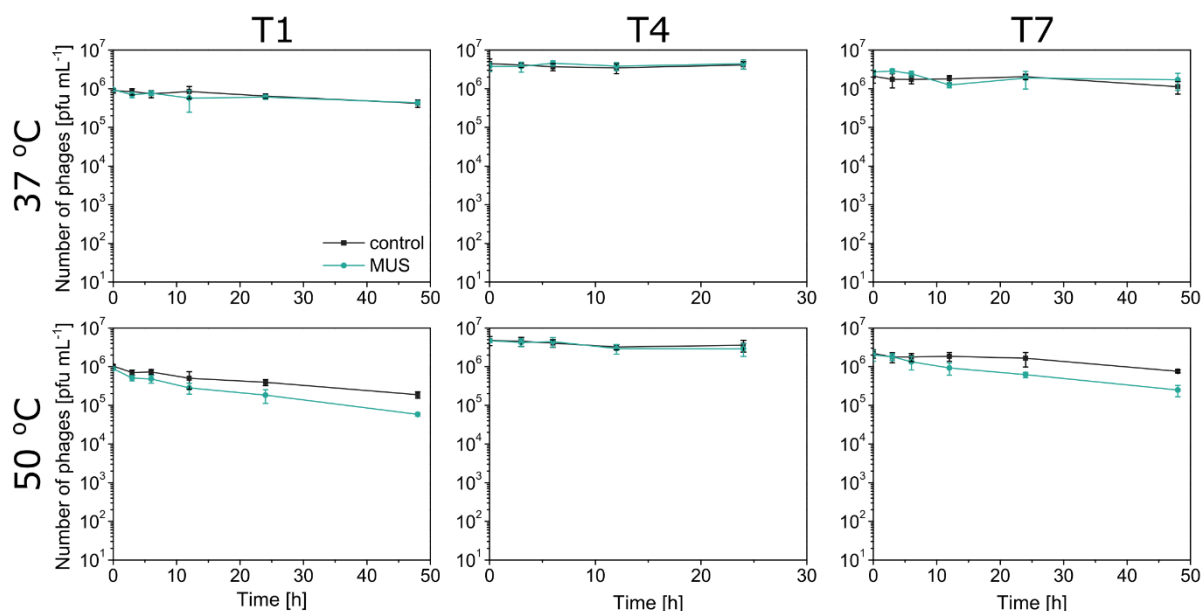

Fig. S6. Analysis of the effect of MUS nanoparticles on bacteriophages T1, T4, and T7. Three types of phages were incubated over many days with 0.5 mg mL<sup>-1</sup> of MUS nanoparticles at 37 °C or 50 °C. The number of phages was measured at various time points. Studied nanoparticles showed no deactivating effect against any of the three types of phages.

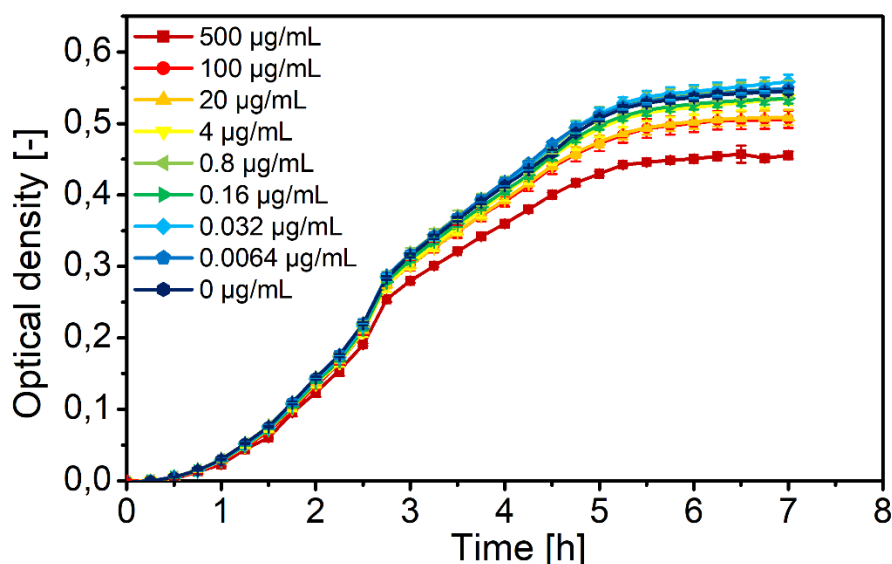

Fig. S7. Influence of nanoparticles MUS:OT (85:15) on bacteria *E. coli* BL21. Growth of bacteria was monitored by measurement of optical density OD<sub>600</sub>. Obtained results indicate that nanoparticles are not toxic for bacteria in tested concentration range, i.e., EC<sub>50</sub> > 500 µg mL<sup>-1</sup>.

Table S2. Properties of structural proteins of bacteriophage T4. Only proteins exposed to the external environment were taken into consideration. FASTA sequences of proteins were taken from Uniprot database. ExPASy ProtParam Tool was used to calculate pI values.

| Unitprot ID | Protein                                 | Gene | pI [-] | Negatively charged residues (Asp + Glu) | Positively charged residues (Arg + Lys) |
|-------------|-----------------------------------------|------|--------|-----------------------------------------|-----------------------------------------|
| CAPSH_BPT4  | Major capsid protein                    | gp23 | 5.45   | 46                                      | 40                                      |
| PORTL_BPT4  | Portal protein                          | 20   | 5.36   | 90                                      | 73                                      |
| CAPSP_BPT4  | Capsid vertex protein                   | 24   | 4.71   | 60                                      | 41                                      |
| SOC_BPT4    | Small outer capsid protein              | soc  | 6.07   | 11                                      | 10                                      |
| HOC_BPT4    | Highly immunogenic outer capsid protein | hoc  | 4.74   | 40                                      | 26                                      |
| BP09_BPT4   | Baseplate protein gp9                   | 9    | 5.01   | 33                                      | 24                                      |
| BP10_BPT4   | Baseplate wedge protein gp10            | 10   | 4.42   | 83                                      | 43                                      |
| BP11_BPT4   | Baseplate wedge protein gp11            | 11   | 5.13   | 21                                      | 15                                      |
| FIB12_BPT4  | Short tail fiber protein gp12           | 12   | 5.80   | 48                                      | 43                                      |
| COMPL_BPT4  | Tail completion protein gp15            | 15   | 4.88   | 38                                      | 27                                      |
| TSP_BPT4    | Tail sheath protein                     | 18   | 4.92   | 74                                      | 59                                      |
| FIBP_BPT4   | Long-tail fiber proximal subunit        | 34   | 5.29   | 139                                     | 120                                     |

|            |                              |     |      |    |    |
|------------|------------------------------|-----|------|----|----|
| FIB35_BPT4 | Long-tail fiber protein gp35 | 35  | 5.06 | 36 | 29 |
| FIB36_BPT4 | Long-tail fiber protein gp36 | 36  | 7.77 | 17 | 18 |
| FIB37_BPT4 | Long-tail fiber protein gp37 | 37  | 8.54 | 85 | 89 |
| WAC_BPT4   | Fibrin                       | wac | 4.56 | 58 | 36 |
| NECK1_BPT4 | Neck protein gp13            | 13  | 5.02 | 36 | 27 |
| NECK2_BPT4 | Neck protein gp14            | 14  | 4.57 | 39 | 22 |

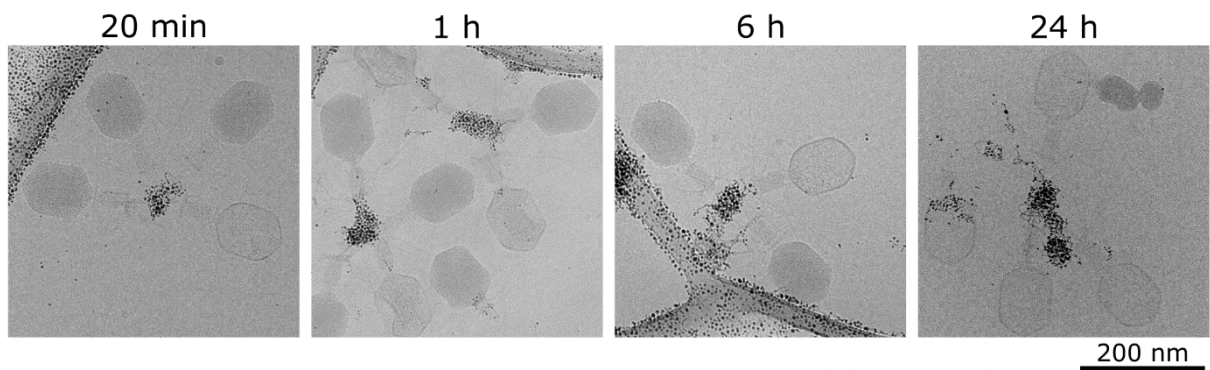

Fig. S8. Time-dependent cryo-TEM analysis of interactions between T4 phages and MUS:OT (85:15) nanoparticles.  $4 \times 10^{10}$  pfu mL<sup>-1</sup> of bacteriophages were incubated with 0.1 mg mL<sup>-1</sup> of nanoparticles in TM buffer at 37 °C for different time periods. Then, the cryo-TEM analysis was performed. Interaction between negatively charged nanoparticles and positively charged fibers of phages was visible already after 20 min of incubation.

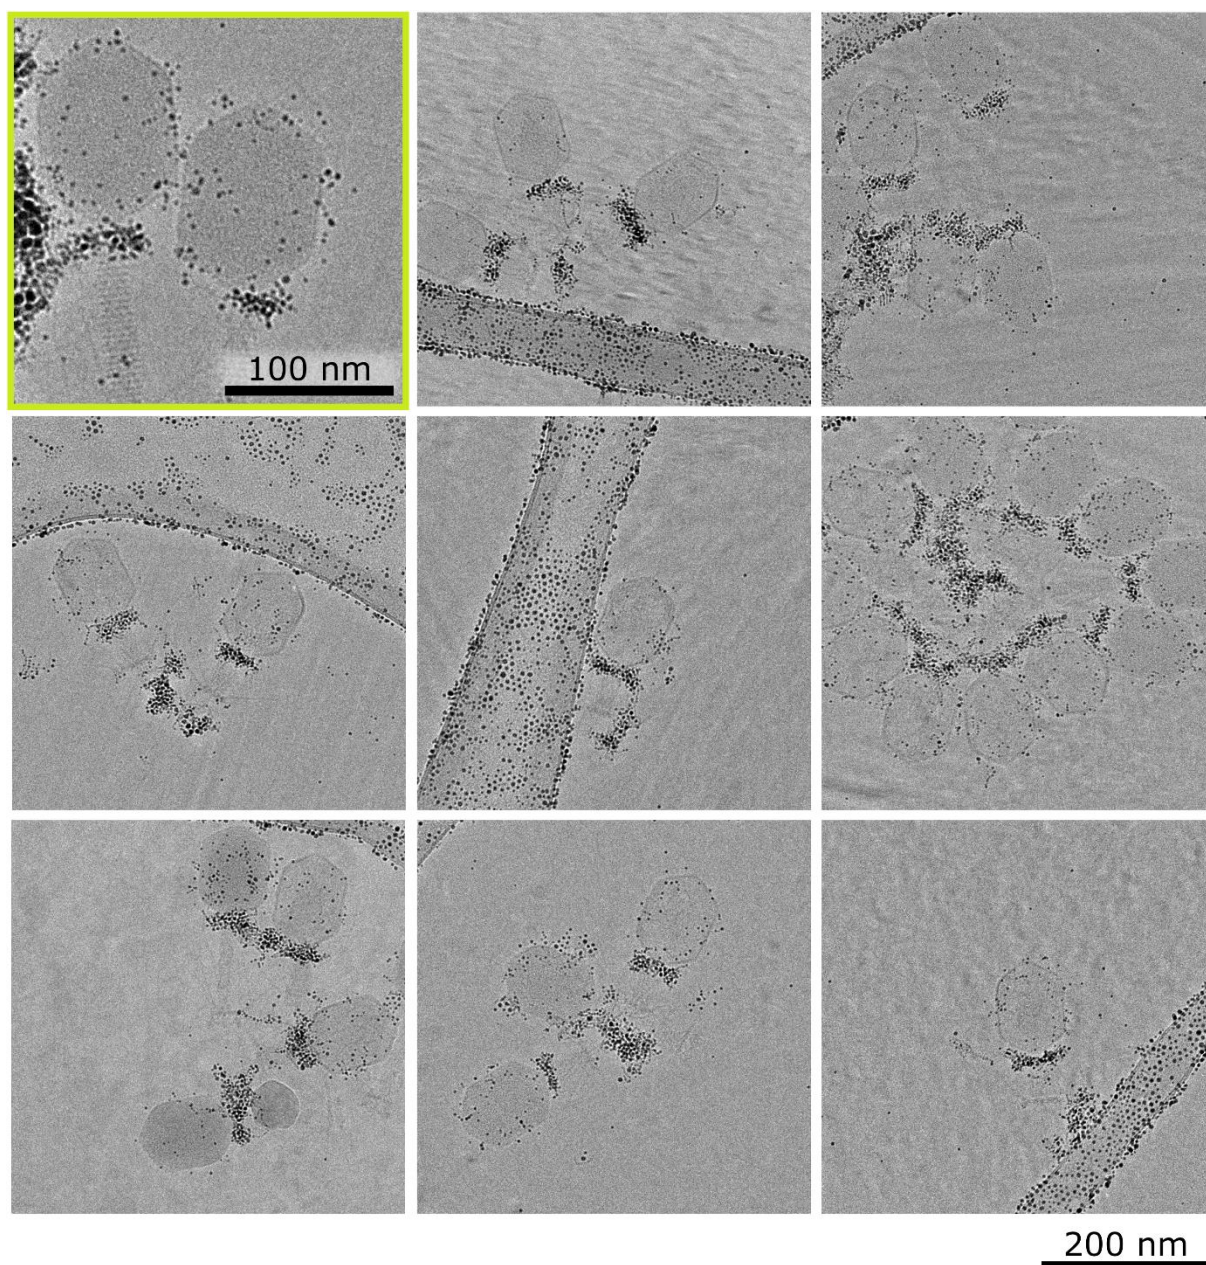

Fig. S9. CryoTEM analysis of interaction between T4 phages and  $0.1 \text{ mg mL}^{-1}$  of MUS:OT (85:15) nanoparticles at  $50 \text{ }^{\circ}\text{C}$  for 24 h. Green box indicates the image with different magnification.

### References

- 1 V. Cagno, P. Andreozzi, M. D'Alicarnasso, P. J. Silva, M. Mueller, M. Galloux, R. Le Goffic, S. T. Jones, M. Vallino, J. Hodek, J. Weber, S. Sen, E. R. Janecek, A. Bekdemir, B. Sanavio, C. Martinelli, M. Donalisio, M. A. R. Welti, J. F. Eleouet, Y. Han, L. Kaiser, L. Vukovic, C. Tapparel, P. Král, S. Krol, D. Lembo and F. Stellacci, *Nat. Mater.*, 2018, **17**, 195–203.
- 2 Z. P. Guven, P. H. J. Silva, Z. Luo, U. B. Cendrowska, M. Gasbarri, S. T. Jones and F. Stellacci, *J. Vis. Exp.*, 2019, **2019**, 1–11.
